# Supplementary material
Source: Royal Society of Chemistry journal article supplement (doi:10.1039/d6lf00079g)
Supplement: d6lf00079g1.pdf [file d6lf00079g1.pdf]

### Supporting Information

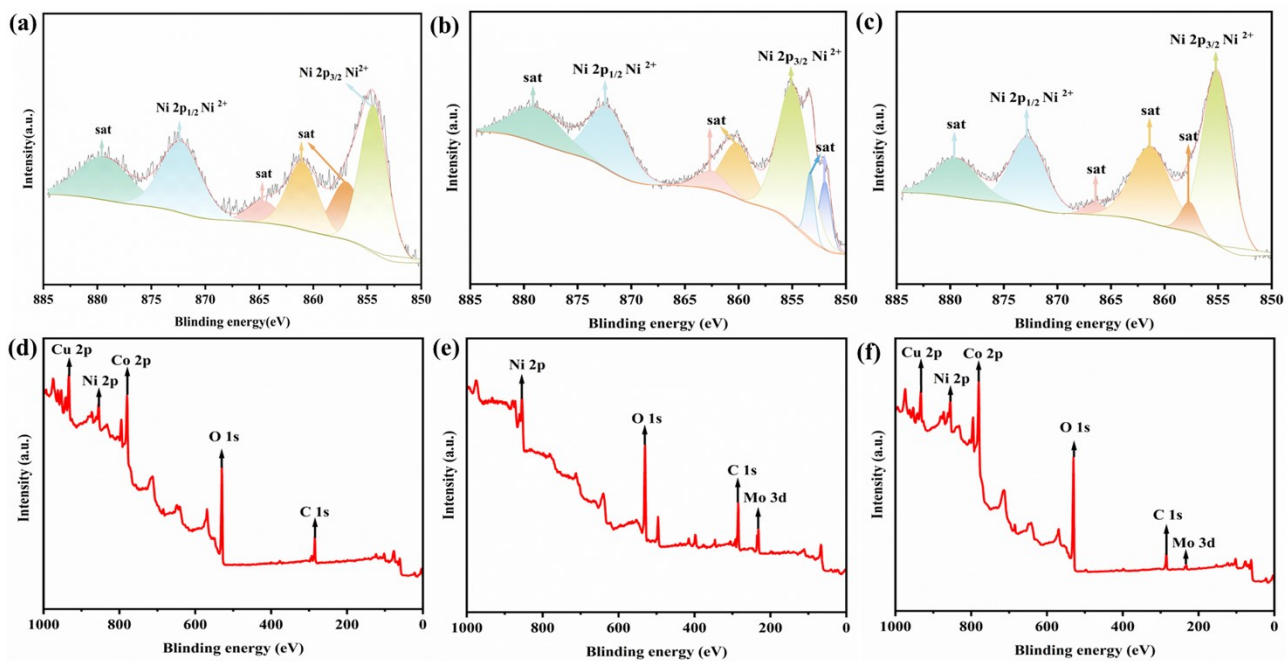

**Fig. S1** Ni 2p and XPS survey spectra of (a, d)  $\text{Cu}_{0.95}\text{Co}_{2.05}\text{O}_4/\text{NF}$ , (b, e)  $\text{MoO}_3/\text{NF}$ , and (c, d)  $\text{Cu}_{0.95}\text{Co}_{2.05}\text{O}_4/\text{MoO}_3/\text{NF}$ .

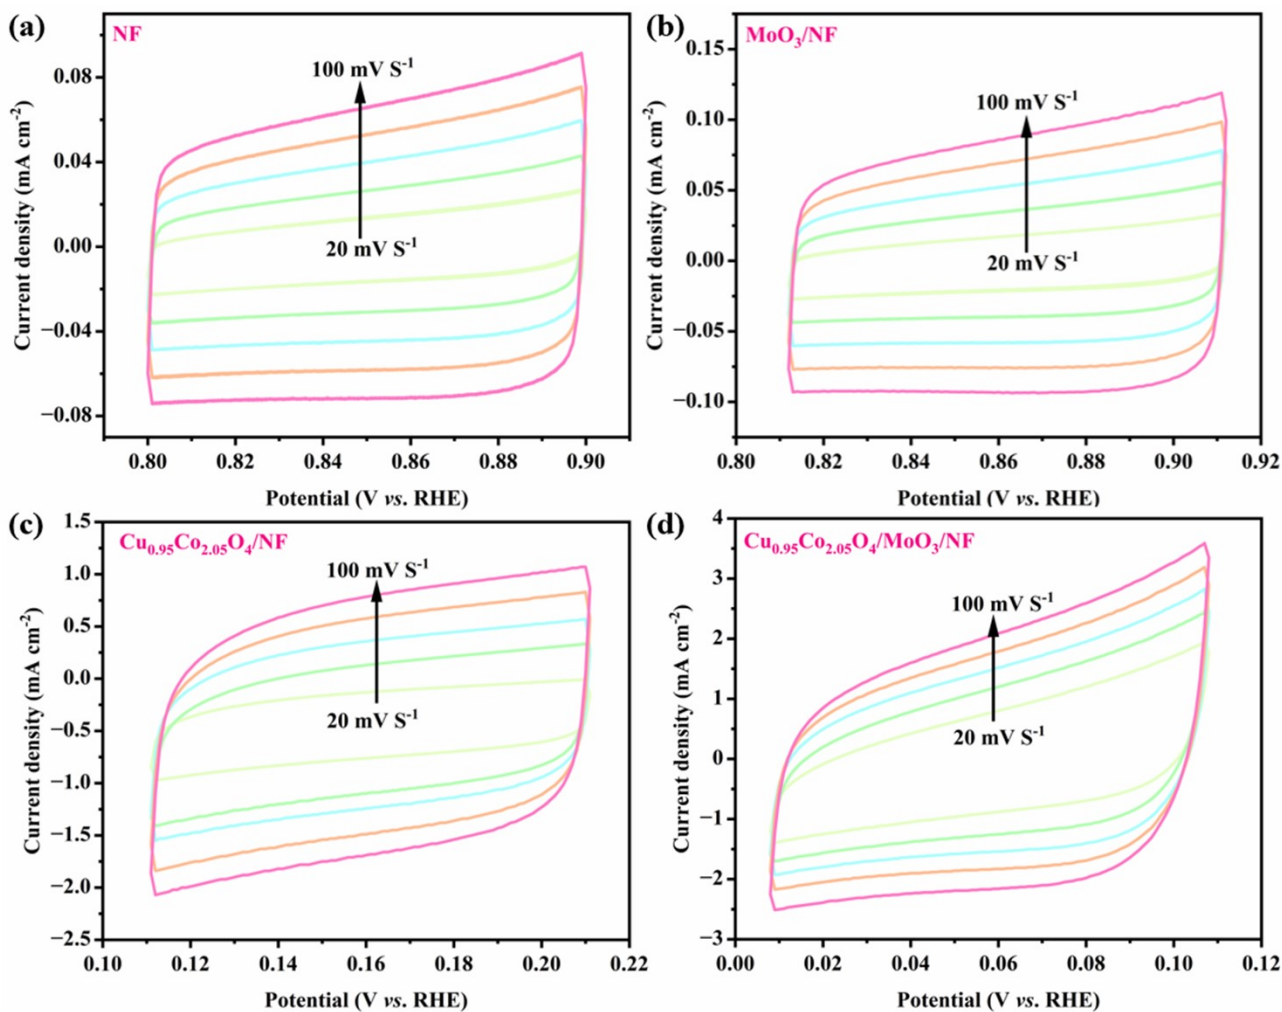

**Fig. S2** CV curves at 20, 40, 60, 80, and 100  $\text{mV s}^{-1}$  in (–) the catalyst (pyrazine/piperazine) | 1 M KOH +  $\text{H}_2\text{O}$  + 0.01 M pyrazine || 1 M KOH +  $\text{H}_2\text{O}$  | Pt(OH<sup>-</sup>/O<sub>2</sub>) (+) with (a) NF, (b) MoO<sub>3</sub>/NF, (c) Cu<sub>0.95</sub>Co<sub>2.05</sub>O<sub>4</sub>/NF and (d) Cu<sub>0.95</sub>Co<sub>2.05</sub>O<sub>4</sub>/MoO<sub>3</sub>/NF as the catalysts and a working electrode and an SCE as the reference electrode.

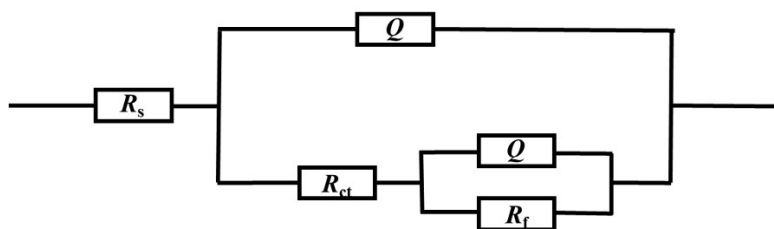

**Fig. S3** Equivalent circuit model.

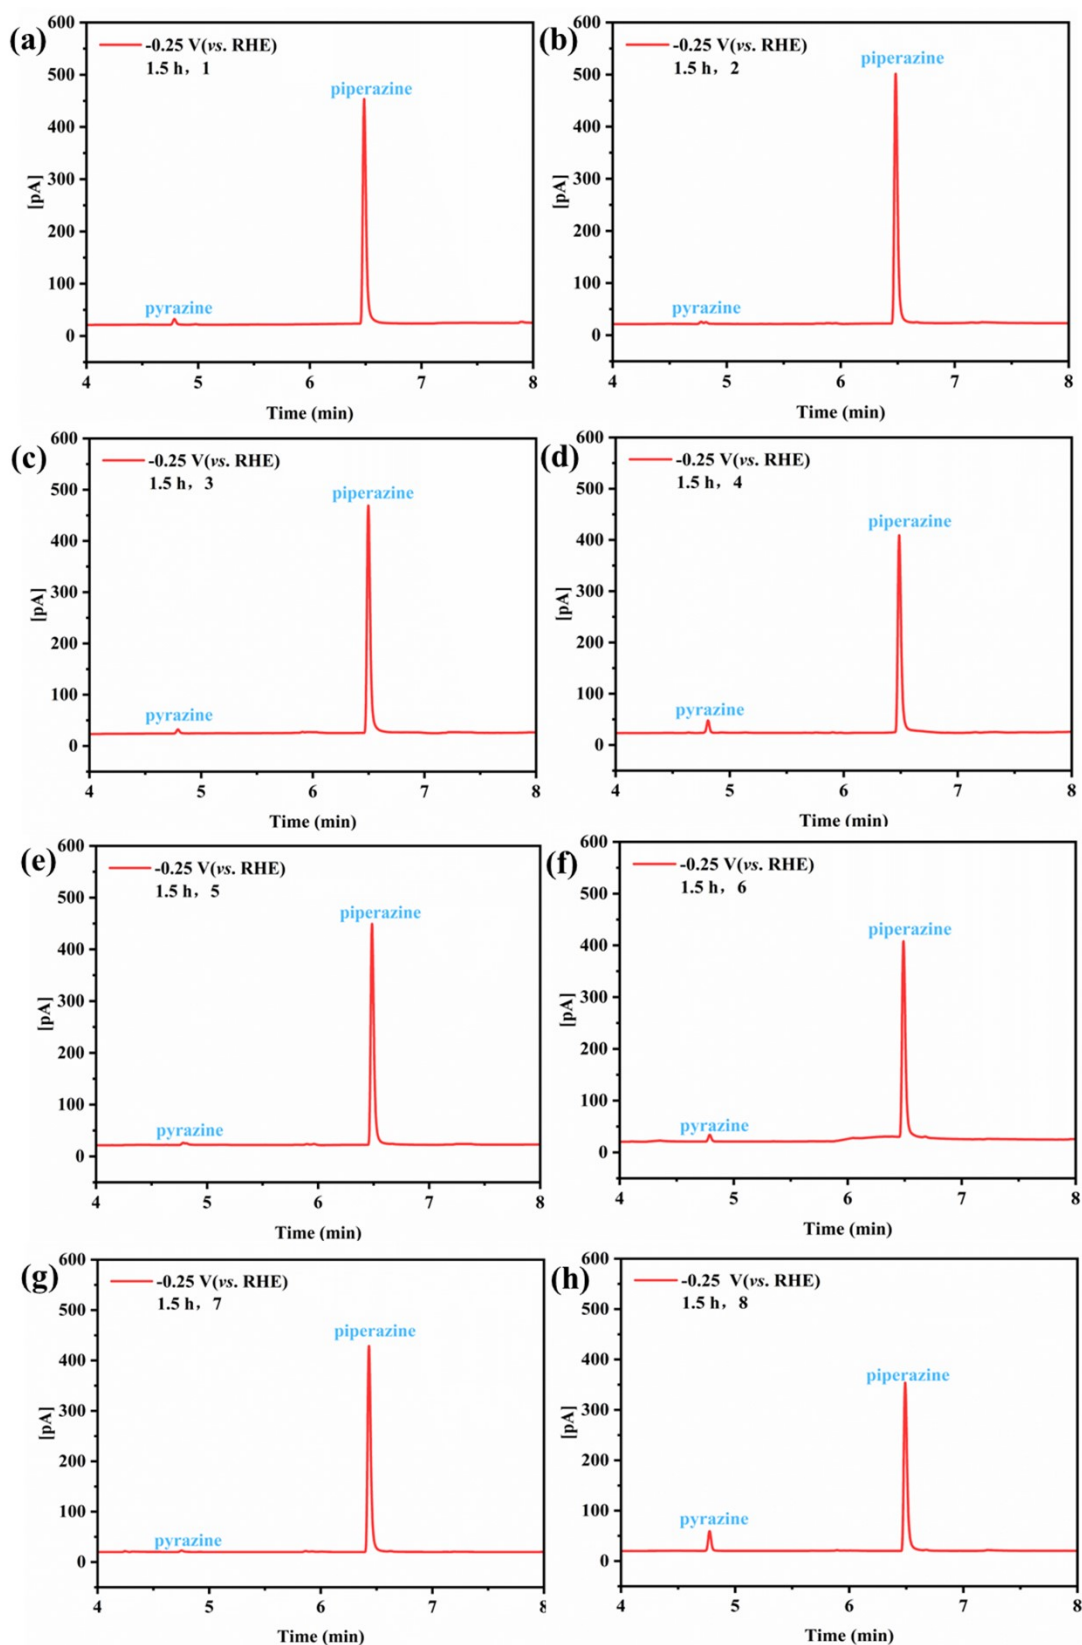

**Fig. S4** GC analysis of the electrolyte after the (a) 1st, (b) 2nd, (c) 3rd, (d) 4th, (e) 5th, (f) 6th, (g) 7th, and (h) 8th chronoamperometry cycles at  $-0.25$  V (vs. RHE) for 1.5 h. The tests were conducted in  $(-)$   $\text{Cu}_{0.95}\text{Co}_{2.05}\text{O}_4/\text{MoO}_3/\text{NF}$  (pyrazine/piperazine) | 1 M KOH + 10 mM pyrazine || 1 M KOH +  $\text{H}_2\text{O}$  | Pt(OH/O<sub>2</sub>) (+) with  $\text{Cu}_{0.95}\text{Co}_{2.05}\text{O}_4/\text{MoO}_3/\text{NF}$  as the working electrode and a HgO/Hg electrode as the reference electrode.

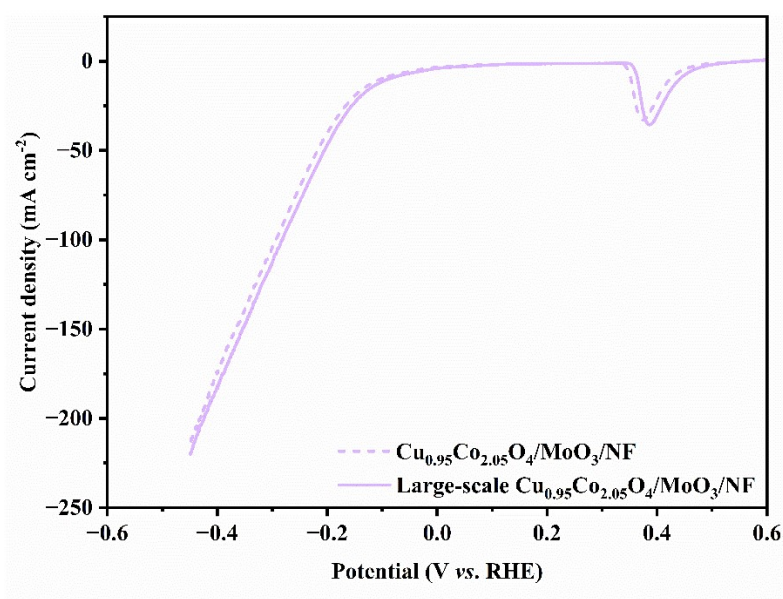

**Fig. S5** Electrochemical measurements of  $\text{Cu}_{0.95}\text{Co}_{2.05}\text{O}_4/\text{MoO}_3/\text{NF}$  in (-)  $\text{Cu}_{0.95}\text{Co}_{2.05}\text{O}_4/\text{MoO}_3/\text{NF}/\text{NF}$  (pyrazine/piperazine) | 1 M KOH + 10 mM pyrazine || 1 M KOH +  $\text{H}_2\text{O}$  | Pt (+) ( $\text{OH}^-/\text{O}_2$ ). LSV curves comparing the large-scale electrode and the conventional-sized electrode in the potential range of -0.45 to 0.6 V (vs. RHE).

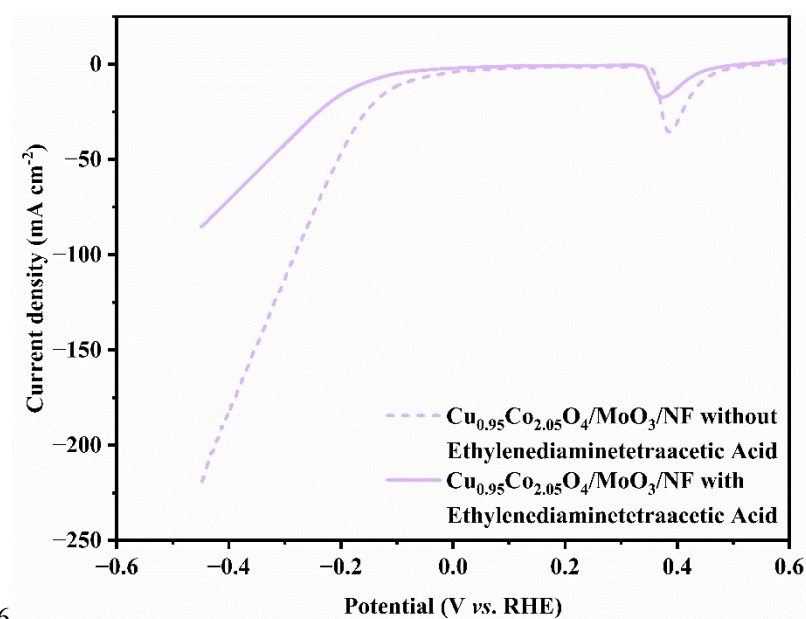

36

**Fig. S6** Electrochemical measurements of  $\text{Cu}_{0.95}\text{Co}_{2.05}\text{O}_4/\text{MoO}_3/\text{NF}$  in (-)  $\text{Cu}_{0.95}\text{Co}_{2.05}\text{O}_4/\text{MoO}_3/\text{NF}$  (pyrazine/piperazine) | 1 M KOH + 10 mM pyrazine with/without 10 mM ethylenediaminetetraacetic acid || 1 M KOH +  $\text{H}_2\text{O}$  | Pt (+) ( $\text{OH}^-/\text{O}_2$ ). LSV curves with and without ethylenediaminetetraacetic acid in the potential range of -0.45 to 0.6 V (vs. RHE).

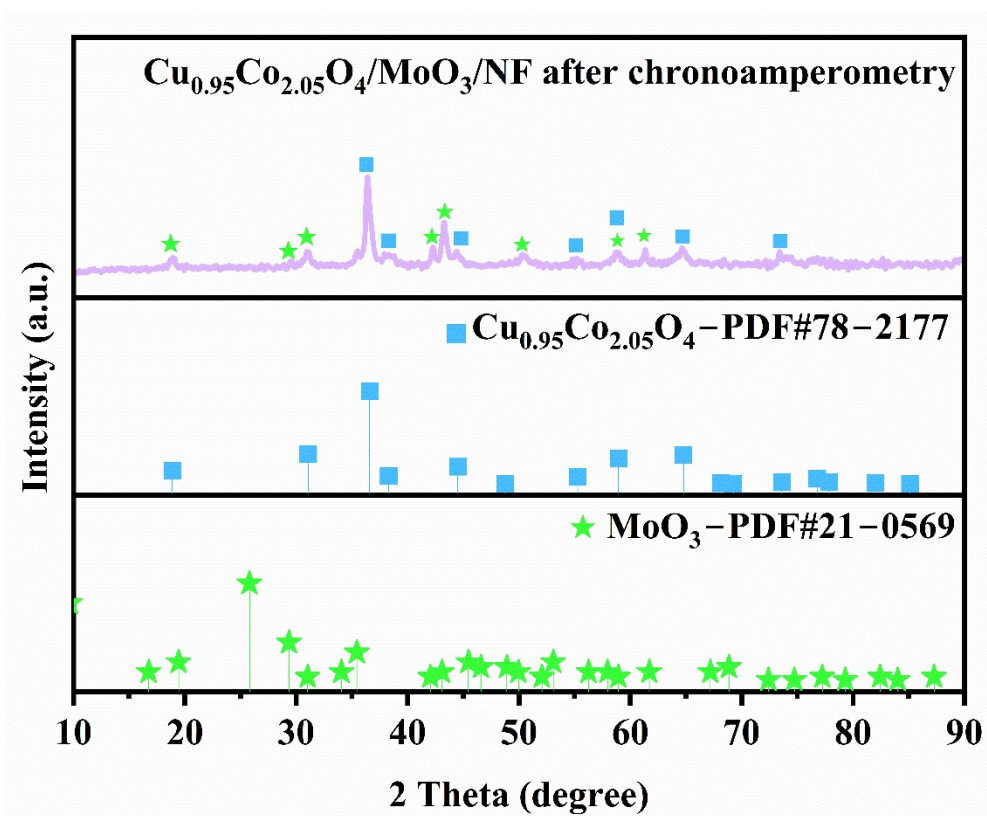

Fig. 7 XRD of Cu<sub>0.95</sub>Co<sub>2.05</sub>O<sub>4</sub>/MoO<sub>3</sub>/NF after 8 cycles of chronoamperometry at -0.25 V (vs. RHE) for 1.5 h.

**Table S1** Electrochemical parameters of the samples.

| Electrochemical parameters                                                         | NF     | MoO <sub>3</sub> /NF | Cu <sub>0.95</sub> Co <sub>2.05</sub> O <sub>4</sub> /NF | Cu <sub>0.95</sub> Co <sub>2.05</sub> O <sub>4</sub> /MoO <sub>3</sub> /NF |
|------------------------------------------------------------------------------------|--------|----------------------|----------------------------------------------------------|----------------------------------------------------------------------------|
| Current density (mA cm <sup>-2</sup> ) at -0.25 V (vs. RHE) in LSV (with pyrazine) | 20.91  | 26.06                | 48.81                                                    | 73.73                                                                      |
| Tafel slope (mV dec <sup>-1</sup> )                                                | 254.89 | 212.08               | 195.80                                                   | 156.22                                                                     |
| Charge transfer resistance (ohm) from EIS at -0.25 V (vs. RHE)                     | 2.60   | 1.71                 | 1.69                                                     | 0.84                                                                       |
| C <sub>dl</sub> (mF cm <sup>-2</sup> )                                             | 0.67   | 0.91                 | 11.30                                                    | 15.66                                                                      |
| ESCA (cm <sup>2</sup> )                                                            | 19.00  | 75.00                | 253.00                                                   | 694.5                                                                      |
| Faradaic efficiency (%) after chronoamperometry at -0.25 V (vs. RHE) for 1.5 h     | 48.69  | 59.49                | 96.70                                                    | 98.11                                                                      |
| Selectivity (%) after chronoamperometry at -0.25 V (vs. RHE) for 1.5 h             | --     | --                   | 39.96                                                    | 98.00                                                                      |
